# Supplementary material for: Genome-Wide Comparative Analysis of the Phospholipase D Gene Families among Allotetraploid Cotton and Its Diploid Progenitors
Source: PLoS One. 2016 May 23;11(5):e0156281. doi: 10.1371/journal.pone.0156281 (PMC4877076; doi:10.1371/journal.pone.0156281)
Supplement: S5 Table — (XLSX) [file pone.0156281.s008.xlsx]

## Sheet: S5 Table
S5 Table The Ka/Ks ratios for duplicate PLD genes in G. arboreum, G. raimondii, and G. hirsutum.
Paralogous Genes	Ka	Ks	Ka/Ks	Selective pressure
GaPLDβ1 – GaPLDβ2	0.2273	1.2864	0.1767	Purifying selection
GaPLDδ1 – GaPLDδ2	0.109	0.5988	0.1821	Purifying selection
GaPLDδ3 – GaPLDδ4	0.1167	0.5993	0.1947	Purifying selection
GaPLDφ1 – GaPLDφ2	0.0877	0.8219	0.1067	Purifying selection
GrPLDβ1 – GrPLDβ2	0.206	1.334	0.1544	Purifying selection
GrPLDβ1 – GrPLDβ3	0.0467	0.1541	0.3029	Purifying selection
GrPLDδ1 – GrPLDδ2	0.1075	0.6054	0.1775	Purifying selection
GrPLDδ3 – GrPLDδ4	0.1208	0.6259	0.193	Purifying selection
GrPLDφ1 – GrPLDφ2	0.0842	0.6875	0.1225	Purifying selection
GhPLDβ1A – GhPLDβ2A	0.1563	1.0325	0.1513	Purifying selection
GhPLDβ1A – GaPLDβ3A	0.0484	0.1674	0.2898	Purifying selection
GhPLDδ1A – GhPLDδ2A	0.1009	0.5937	0.1699	Purifying selection
GhPLDδ3A – GhPLDδ4A	0.108	0.6196	0.1743	Purifying selection
GhPLDφ1A – GhPLDφ2A	0.084	0.7718	0.1089	Purifying selection
GhPLDβ1D – GhPLDβ2D	0.2108	1.1645	0.181	Purifying selection
GhPLDβ1D – GhPLDβ3D	0.0459	0.1588	0.2893	Purifying selection
GhPLDδ1D – GhPLDδ2D	0.1069	0.597	0.1791	Purifying selection
GhPLDδ3D – GrPLDδ4D	0.1157	0.6057	0.191	Purifying selection
GhPLDφ1D – GhPLDφ2D	0.0848	0.6742	0.1257	Purifying selection
